# Supplementary material for: Anatomical mechanism of spontaneous recovery in regions caudal to thoracic spinal cord injury lesions in rats
Source: PeerJ. 2017 Jan 10;5:e2865. doi: 10.7717/peerj.2865 (PMC5228130; doi:10.7717/peerj.2865)
Supplement: Supplemental Information 1 — Before beginning electrophysiological examinations each rat was anesthetized. An electrophysiological examination was given before and after each hemisection operation. [file peerj-05-2865-s001.xlsx]

## Sheet: The first step
The first step
Latency period in TA before and after second hemisection
Ipsilateral Group			Left	Before	After		Right	Before	After
			Number 1	4.79	5.51		Number 1	4.6	5.48
			Number 2	4.69	4.77		Number 2	4.65	5.01
			Number 3	4.76	5.4		Number 3	4.74	5.56
			Number 4	4.5	5.48		Number 4	4.53	5.4
			Number 5	4.82	5.66		Number 5	4.84	5.77
			Number 6	4.66	5.48		Number 6	4.56	5.46
			Number 7	4.85	5.03		Number 7	5.11	5.3
			Number 8	4.72	4.75		Number 8	4.76	4.88
				4.72375	5.26			4.72375	5.3575
				0.110962	0.356971			0.188751	0.290455
Sham Group			Left	Before	After		Right	Before	After
			Number 1	4.71	5		Number 1	4.84	4.97
			Number 2	4.47	4.82		Number 2	4.5	4.84
			Number 3	4.68	5.03		Number 3	4.68	5
			Number 4	4.5	5		Number 4	4.5	5
			Number 5	4.52	4.75		Number 5	4.47	4.66
			Number 6	4.86	5		Number 6	4.85	5
			Number 7	4.67	4.91		Number 7	4.66	4.78
			Number 8	4.97	5.19		Number 8	5	5.19
			Number 9	4.34	4.38		Number 9	4.52	4.55
			Number 10	5.03	5.08		Number 10	4.81	5.05
				4.675	4.916			4.683	4.904
				0.22545	0.226137			0.185176	0.194205
Control Group			Left	Before	After		Right	Before	After
			Number 1	5.43	5.53		Number 1	5.36	5.4
			Number 2	4.57	4.63		Number 2	4.65	5.18
			Number 3	4.77	5.52		Number 3	4.95	5.67
			Number 4	3.94	5.09		Number 4	3.98	5.24
				4.6775	5.1925			4.735	5.3725
				0.613806	0.427424			0.581406	0.218994
Contralateral Group			Left	Before	After		Right	Before	After
			Number 1	4.66	6.03		Number 1	4.87	6.49
			Number 2	4.55	5.95		Number 2	4.6	6.19
			Number 3	4.29	6.05		Number 3	4.5	6.2
			Number 4	4.43	5.89		Number 4	4.45	6.13
			Number 5	4.74	6.01		Number 5	4.87	6.46
			Number 6	4.63	6.04		Number 6	4.71	6.15
			Number 7	4.45	5.32		Number 7	4.89	5.4
			Number 8	5.08	6.14		Number 8	5.16	6.35
				4.60375	5.92875			4.75625	6.17125
				0.240353	0.256651			0.236881	0.341235
Tansection Group			Left	Before	After		Right	Before	After
			Number 1	4.6	6.56		Number 1	4.63	6.46
			Number 2	5	6.64		Number 2	4.6	6.46
			Number 3	4.02	6.85		Number 3	4.05	6.83
			Number 4	4.95	7.14		Number 4	4.92	6.8
			Number 5	4.82	6.6		Number 5	4.7	6.5
			Number 6	4.7	7.12		Number 6	4.6	7.12
			Number 7	4.71	5.55		Number 7	4.76	5.45
			Number 8	4.71	6.5		Number 8	4.76	6.48
				4.68875	6.62			4.6275	6.5125
				0.302014	0.498139			0.256613	0.491085
Latency period in LTA before and after second hemisection
Ipsilateral Group			Left	Before	After		Right	Before	After
			Number 1	4.95	5.56		Number 1	4.84	5.59
			Number 2	5.2	5.48		Number 2	4.87	4.62
			Number 3	4.84	5.53		Number 3	4.82	5.69
			Number 4	5.05	5.11		Number 4	4.61	5.6
			Number 5	4.92	5.72		Number 5	4.92	5.87
			Number 6	4.74	5.575		Number 6	4.66	4.67
			Number 7	4.95	5.51		Number 7	4.69	4.86
			Number 8	4.81	4.91		Number 8	4.95	4.98
				4.9325	5.42437			4.795	5.235
				0.14479	0.270838			0.126152	0.503218
Sham Group			Left	Before	After		Right	Before	After
			Number 1	4.87	5.05		Number 1	4.92	5.03
			Number 2	4.58	4.95		Number 2	4.63	4.92
			Number 3	4.76	5.08		Number 3	4.76	5.08
			Number 4	4.55	5.05		Number 4	4.55	5.03
			Number 5	4.63	4.76		Number 5	4.55	4.76
			Number 6	4.94	5.05		Number 6	4.92	5.13
			Number 7	4.73	4.82		Number 7	4.71	5.32
			Number 8	5.11	5.29		Number 8	5.08	5.29
			Number 9	4.45	4.45		Number 9	4.6	4.63
			Number 10	5.08	5.15		Number 10	4.87	5.11
				4.77	4.965			4.759	5.03
				0.225783	0.236467			0.182236	0.21489
Control Group			Left	Before	After		Right	Before	After
			Number 1	5.54	5.7		Number 1	5.53	5.46
			Number 2	4.76	4.89		Number 2	4.73	5.32
			Number 3	5.25	5.78		Number 3	5.07	5.24
			Number 4	4.09	5.26		Number 4	4.21	5.49
				4.91	5.4075			4.885	5.3775
				0.634403	0.413874			0.556747	0.117863
Contralateral Group			Left	Before	After		Right	Before	After
			Number 1	4.87	6.49		Number 1	4.97	6.555
			Number 2	4.6	6.21		Number 2	4.66	6.06
			Number 3	4.5	6.2		Number 3	4.5	6.125
			Number 4	4.45	6.12		Number 4	4.2	5.98
			Number 5	4.87	6.46		Number 5	4.87	5.73
			Number 6	4.71	6.15		Number 6	4.71	6.2
			Number 7	4.89	5.4		Number 7	4.6	5.3
			Number 8	5.16	6.35		Number 8	5.16	6.22
				4.75625	6.1725			4.70875	6.02125
				0.236881	0.341666			0.296284	0.373275
Tansection Group			Left	Before	After		Right	Before	After
			Number 1	4.79	6.77		Number 1	4.68	6.99
			Number 2	5.11	6.93		Number 2	4.84	6.51
			Number 3	4.13	6.93		Number 3	4.18	6.91
			Number 4	5.05	7.22		Number 4	5.03	6.96
			Number 5	4.87	6.72		Number 5	4.84	6.87
			Number 6	4.76	7.2		Number 6	4.76	7.25
			Number 7	4.95	5.65		Number 7	4.82	5.71
			Number 8	4.87	6.56		Number 8	4.82	6.59
				4.81625	6.7475			4.74625	6.72375
				0.302227	0.497931			0.249052	0.470712
Latency period in spinal cord before and after second hemisection
Ipsilateral Group			Left	Before	After		Right	Before	After
			Number 1	1.12	1.2		Number 1	1.09	1.19
			Number 2	1.16	1.12		Number 2	1.17	1.17
			Number 3	1.24	1.25		Number 3	1.22	1.24
			Number 4	1.2	1.26		Number 4	1.25	1.29
			Number 5	1.13	1.14		Number 5	1.12	1.13
			Number 6	1.11	1.13		Number 6	1.18	1.22
			Number 7	1.23	1.25		Number 7	1.21	1.23
			Number 8	1.17	1.2		Number 8	1.19	1.22
				1.17	1.19375			1.17875	1.21125
				0.0495696	0.0575543			0.0524915	0.0482368
Sham Group			Left	Before	After		Right	Before	After
			Number 1	1.16	1.16		Number 1	1.16	1.19
			Number 2	1.15	1.16		Number 2	1.15	1.16
			Number 3	1.22	1.24		Number 3	1.24	1.27
			Number 4	1.01	1.03		Number 4	1.14	1.16
			Number 5	1.14	1.16		Number 5	1.11	1.19
			Number 6	1.11	1.19		Number 6	1.11	1.22
			Number 7	1.16	1.22		Number 7	1.16	1.22
			Number 8	0.953	1.01		Number 8	1.03	1.08
			Number 9	1.27	1.3		Number 9	1.27	1.32
			Number 10	1.15	1.24		Number 10	1.24	1.27
				1.1323	1.171			1.161	1.208
				0.092181	0.0913418			0.0724875	0.068443
Control Group			Left	Before	After		Right	Before	After
			Number 1	1.095	1.23		Number 1	1.06	1.26
			Number 2	1.21	1.3		Number 2	1.23	1.31
			Number 3	1.3	1.23		Number 3	1.2	1.22
			Number 4	1.06	1.07		Number 4	1.11	1.13
				1.16625	1.2075			1.15	1.23
				0.109801	0.0974252			0.0787401	0.0761577
Contralateral Group			Left	Before	After		Right	Before	After
			Number 1	1.34			Number 1	1.3
			Number 2	1.01			Number 2	1.03
			Number 3	1.16			Number 3	1.16
			Number 4	1.14			Number 4	1.16
			Number 5	1.06			Number 5	1.11
			Number 6	1.38			Number 6	1.4
			Number 7	1.24			Number 7	1.24
			Number 8	1.24			Number 8	1.19
				1.19625				1.19875
				0.128723				0.114572
Tansection Group			Left	Before	After		Right	Before	After
			Number 1	1.4			Number 1	1.38
			Number 2	1.14			Number 2	1.11
			Number 3	1.22			Number 3	1.22
			Number 4	1.16			Number 4	1.19
			Number 5	1.14			Number 5	1.08
			Number 6	1.19			Number 6	1.19
			Number 7	1.15			Number 7	1.35
			Number 8	1.27			Number 8	1.24
				1.20875				1.22
				0.0895126				0.104471

## Sheet: The second step
Latency period after second hemisection in the second step
Operation Group
	TA			LTA
T8	Left	Right		Left	Right
Number 1	4.83	4.05		4.9	4.4
Number 2	4.76	4.58		5.08	5.77
Number 3	5.51	5.48		5.56	5.59
Number 4	4.77	5.01		4.98	4.62
Number 5	5.4	5.56		5.53	5.69
Number 6	5.77	5.66		5.87	5.72
Number 7	5.48	5.46		5.58	5.67
Number 8	5.55	5.35		5.58	5.4
	5.25875	5.14375		5.385	5.3575
	0.405267	0.564091		0.34953	0.538032
T9	Left	Right		Left	Right
Number 1	5.27	5.2		5.39	5.31
Number 2	5.33	5.36		5.43	5.45
Number 3	5.3	5.03		5.46	5.51
Number 4	5.48	5.4		5.11	5.6
Number 5	4.95	4.92		5.13	5.03
Number 6	5.63	5.19		5.78	5.37
Number 7	5	5.03		5.28	5.11
Number 8	5.28	5.06		5.37	5.11
	5.28	5.14875		5.36875	5.31125
	0.224499	0.169237		0.211622	0.208973
T10	Left	Right		Left	Right
Number 1	5.72	4.89		5.82	5.29
Number 2	5.72	5.85		5.78	5.9
Number 3	6.04	5.86		6.04	6.15
Number 4	5.77	5.61		5.85	5.66
Number 5	5.23	5.15		5.29	5.56
Number 6	5.56	5.5		5.66	5.53
Number 7	5.5	5.15		5.82	5.25
	5.64857	5.43		5.75143	5.62
	0.252747	0.375722		0.232553	0.32104
T11	Left	Right		Left	Right
Number 1	7.16	6.97		7.21	6.49
Number 2	7.04	6.54		7.01	7
Number 3	6.23	6.02		6.54	6.5
Number 4	5.57	5.2		6.02	5.43
Number 5	5.19	5.12		5.58	5.47
Number 6	5.56	5.23		5.66	5.35
Number 7	5.98	5.71		5.61	5.82
	6.10429	5.82714		6.23286	6.00857
	0.757075	0.720549		0.688082	0.651957
T12	Left	Right		Left	Right
Number 1	7.02	6.73		7.09	6.34
Number 2	7.13	5.96		7.15	5.78
Number 3	5.86	5.53		6.04	5.63
Number 4	6.27	6.1		6.33	6.19
Number 5	6.45	6.25		6.51	6.33
Number 6	6.32	6.25		6.46	6.35
Number 7	6.76	6.56		6.87	6.79
	6.54429	6.19714		6.63571	6.20143
	0.450661	0.394111		0.412466	0.38912
Control Group
	TA			LTA
T8	Left	Right		Left	Right
Number 1	4.82	4.8		4.89	4.87
Number 2	5.04	5.02		5.02	5.06
Number 3	4.86	4.78		5.15	4.94
Number 4	4.48	4.55		4.8	4.8
Number 5	4.48	4.23		4.66	4.33
Number 6	5.48	5.53		5.65	5.79
Number 7	4.59	4.35		4.69	4.54
	4.82143	4.75143		4.98	4.90429
	0.358163	0.438764		0.343123	0.462704
T9	Left	Right		Left	Right
Number 1	5.37	5.17		5.72	5.28
Number 2	5.23	5.08		5.55	5.14
Number 3	4.53	4.25		4.87	4.66
Number 4	4.66	4.33		4.93	4.54
Number 5	4.72	4.54		4.6	4.76
Number 6	4.9	4.87		4.92	5.04
Number 7	4.45	4.267		4.7	4.49
Number 8	4.81	4.69		4.92	4.77
	4.83375	4.64962		5.02625	4.835
	0.323416	0.363807		0.39641	0.28775
T10	Left	Right		Left	Right
Number 1	6.02	5.98		6.17	6.03
Number 2	6.22	6.17		6.28	6.25
Number 3	4.75	4.61		4.83	4.65
Number 4	5.09	5.13		5.49	5.25
Number 5	4.63	4.79		4.77	4.87
Number 6	5.52	5.58		5.72	5.91
Number 7	5.02	4.59		5.2	4.78
	5.32143	5.26429		5.49429	5.39143
	0.616966	0.652938		0.602408	0.661978
T11	Left	Right		Left	Right
Number 1	7.06	6.62		7.1	6.68
Number 2	7.12	7.08		7.17	7.15
Number 3	6.57	6.28		6.84	6.37
Number 4	5.3	5.03		5.47	5.26
Number 5	6.05	5.8		6.12	5.99
Number 6	5.77	5.26		5.95	5.85
Number 7	5.76	5.4		5.89	5.79
Number 8	6.25	6.05		6.36	6.15
	6.235	5.94		6.3625	6.155
	0.646595	0.706238		0.617917	0.581427
T12	Left	Right		Left	Right
Number 1	7.12	6.89		7.18	6.92
Number 2	7.03	6.14		7.11	6.19
Number 3	6.73	6.85		6.74	6.8
Number 4	6.26	6.25		6.37	6.41
Number 5	6.82	6.96		7.12	7.037
Number 6	5.88	5.68		5.95	5.78
Number 7	7.52	6.93		7.73	7.3
	6.76571	6.52857		6.88571	6.63386
	0.549055	0.504956		0.586994	0.531028
Sham Group
T8	Left	Right		Left	Right
Number 1	4.78	4.79		4.98	4.82
Number 2	4.62	4.61		4.73	4.65
Number 3	5	4.97		5.05	5.03
Number 4	4.82	4.84		4.95	4.92
Number 5	5.03	5		5.08	5.08
Number 6	5	5		5.05	5.03
Number 7	4.75	4.66		4.76	4.96
	4.85714	4.83857		4.94286	4.92714
	0.155854	0.161186		0.142562	0.149412
T9	Left	Right		Left	Right
Number 1	4.75	4.69		4.86	4.81
Number 2	4.85	4.81		4.88	4.87
Number 3	5	5		5.05	5.13
Number 4	4.91	4.78		5.03	4.82
Number 5	5.19	5.19		5.29	5.29
Number 6	4.38	4.55		4.45	4.63
Number 7	5.08	5.05		5.15	5.11
	4.88	4.86714		4.95857	4.95143
	0.264323	0.222914		0.269099	0.230538
T10	Left	Right		Left	Right
Number 1	4.64	4.46		4.72	4.55
Number 2	4.67	4.51		4.75	4.67
Number 3	5.02	5.02		5.17	5.13
Number 4	5.67	5.47		5.72	5.48
Number 5	5.08	5.15		5.19	5.29
Number 6	5.23	5.25		5.33	5.35
Number 7	4.56	4.52		4.75	4.63
	4.98143	4.91143		5.09	5.01429
	0.39545	0.410992		0.373943	0.387464
T11	Left	Right		Left	Right
Number 1	4.82	4.76		4.95	4.86
Number 2	4.86	4.85		4.97	4.95
Number 3	4.65	4.62		4.76	4.72
Number 4	5.52	5.65		5.7	5.82
Number 5	5.44	5.48		5.57	5.66
Number 6	5.02	5.02		5.15	5.23
Number 7	4.77	4.75		4.81	4.79
	5.01143	5.01857		5.13	5.14714
	0.339334	0.395366		0.368827	0.438547
T12	Left	Right		Left	Right
Number 1	4.89	4.87		5.1	4.89
Number 2	4.71	4.76		4.82	4.83
Number 3	5.43	5.47		5.71	5.53
Number 4	4.6	4.6		4.66	4.87
Number 5	5.43	5.46		5.49	5.58
Number 6	5.55	5.52		5.65	5.61
Number 7	4.77	4.75		4.81	4.82
	5.05429	5.06143		5.17714	5.16143
	1.74405	1.68387		1.77787	1.7267
